# Supplementary material
Source: Springer Nature journal article supplement (https://www.springermedizin.de/resource/supplementary/12889_2011_3445_MOESM1_ESM.pdf/9489056)
Supplement: MOESM1 [file 9489056]

Assessed for eligibility  
(32 schools)

Excluded:  
Did not match (n = 8)

*A priori* matching and  
randomisation  
(24 schools)

Allocated to intervention group  
(12 schools)

Allocated to control group  
(13 schools)\*  
\*One school dropped out after  
being randomised to the control  
group and was replaced by a  
matching school

Number of girls eligible  
(N = 900)

Number of girls eligible  
(N = 869)

Number of participants (N=771)  
Absent on assessment day  
(N =79)  
Refused participation  
(N=50)

Number of participants (N =747)  
Absent on assessment day  
(N =69)  
Refused participation (N=53)
